# Supplementary material for: Short and Long-Term Outcomes of Lesion Index-Guided High-Power Short-Duration Approach for Atrial Fibrillation Ablation
Source: MDPI journal article supplement (doi:10.3390/jcm12154986), 2023-07-28
Supplement: s1 [file s1]

## **SUPPLEMENTAL MATERIAL**

### **Study exclusion criteria**

- Long-standing persistent atrial fibrillation defined as continuous AF greater than 12 months in duration.
- Previous ablation or surgery in the left atrium.
- Implanted left atrial appendage occlude.
- Implanted mitral or tricuspid valve replacement.
- Implanted cardiac defibrillator (ICD).
- Participation in another clinical investigation that may confound the results of this study.
- Pregnant or nursing.
- Presence of other anatomic or comorbid conditions, or other medical, social, or psychological conditions that, in the investigator's opinion, could limit the subject's ability to participate in the clinical.
- Life expectancy less than 12 months.
